# Supplementary material for: Comparison of Corticomuscular Coherence Under Different Balance Paradigms in Individuals with and without Forward Head Posture
Source: Research Square preprint supplement (doi:10.21203/rs.3.rs-5822157/v1), 2025-04-22
Supplement: Supplementary file 1 [file 03d51b0c361465fcdb0661e7.docx]

**Supplement 1.**

**Figure 7.** Bar chart representing the mean CMC for each frequency band under the four balance paradigms in the forward head posture (FHP) group.
