# Supplementary material for: Comparison of Corticomuscular Coherence Under Different Balance Paradigms in Individuals with and without Forward Head Posture
Source: Research Square preprint supplement (doi:10.21203/rs.3.rs-5822157/v1), 2025-04-22
Supplement: Supplementary file 2 [file 11b5417f215fc42e34e4d02b.docx]

**Supplement 1.**

**Figure 6.** Bar chart representing the mean CMC for each frequency band under the four balance stages in the normal head posture (NHP) group.
