# Supplementary material for: Comparison of Corticomuscular Coherence Under Different Balance Paradigms in Individuals with and without Forward Head Posture
Source: Research Square preprint supplement (doi:10.21203/rs.3.rs-5822157/v1), 2025-04-22
Supplement: Supplementary file 3 [file 50b83f39c821367d0a5fc6ab.docx]

**Supplement 1.**

**Table 6.** Post-hoc analysis – CMC in 5 frequency bands

| **Frequency Band** | **Group 1 (NHP)** | **Group 2 (FHP)** | **Mean Diff** | **p-value** |
| --- | --- | --- | --- | --- |
| **Delta** | Stage 1.0 | Stage 1.0 | -0.011400 | 0.0042 |
| Stage 2.0 | Stage 2.0 | -0.010200 | 0.0162 |
| Stage_3.0 | Stage_3.0 | -0.007000 | 0.2818 |
| Stage 4.0 | Stage 4.0 | -0.021700 | < 0.001 |
| **Theta** | Stage 1.0 | Stage 1.0 | -0.000400 | 0.9 |
| Stage 2.0 | Stage 2.0 | -0.010900 | 0.0355 |
| Stage_3.0 | Stage_3.0 | 0.000300 | 0.9 |
| Stage 4.0 | Stage 4.0 | -0.033000 | < 0.001 |
| **Alpha** | Stage 1.0 | Stage 1.0 | 0.000900 | 0.9 |
| Stage 2.0 | Stage 2.0 | 0.000100 | 0.9 |
| Stage_3.0 | Stage_3.0 | -0.007800 | < 0.001 |
| Stage 4.0 | Stage 4.0 | -0.007900 | < 0.001 |
| **Beta** | Stage 1.0 | Stage 1.0 | -0.014600 | 0.0445 |
| Stage 2.0 | Stage 2.0 | -0.020600 | 0.0005 |
| Stage_3.0 | Stage_3.0 | -0.008300 | 0.6513 |
| Stage 4.0 | Stage 4.0 | -0.034400 | < 0.001 |
| **Gamma** | Stage 1.0 | Stage 1.0 | -0.002200 | 0.9 |
| Stage 2.0 | Stage 2.0 | -0.009400 | 0.09 |
| Stage_3.0 | Stage_3.0 | -0.000200 | 0.9 |
| Stage 4.0 | Stage 4.0 | -0.027800 | < .001 |
