# Supplementary material for: Comparison of Corticomuscular Coherence Under Different Balance Paradigms in Individuals with and without Forward Head Posture
Source: Research Square preprint supplement (doi:10.21203/rs.3.rs-5822157/v1), 2025-04-22
Supplement: Supplementary file 4 [file 6cb2d7aed2c43c33215a5dbb.docx]

**Supplement 1.**

**Table 5.** Post-hoc analysis – peak and average CMC

|  | **Group 1 (NHP)** | **Group 2 (FHP)** | **Mean Diff** | **p-value** |
| --- | --- | --- | --- | --- |
| Peak CMC | Stage 1.0 | Stage 1.0 | -0.079600 | 0.1059 |
| Stage 2.0 | Stage 2.0 | -0.076800 | 0.1343 |
| Stage_3.0 | Stage_3.0 | -0.088800 | 0.0443 |
| Stage 4.0 | Stage 4.0 | -0.242200 | < .001 |
| Average CMC | Stage 1.0 | Stage 1.0 | -0.000400 | 0.9 |
| Stage 2.0 | Stage 2.0 | -0.000400 | 0.9 |
| Stage_3.0 | Stage_3.0 | -0.003000 | < .001 |
| Stage 4.0 | Stage 4.0 | -0.015900 | < .001 |
